# Supplementary material for: Spatial distribution of organic pollutants in industrial construction and demolition waste and their mutual interaction on an abandoned pesticide manufacturing plant
Source: Royal Society of Chemistry journal article supplement (doi:10.1039/c6em00019c), 2016-01-01
Supplement: c6em00019c1.pdf [file c6em00019c1.pdf]

1 **Table S1 Operating conditions of GC-MS of organic pesticides**

|                                          | Temperature settings(°C) |            |            |            | Oven temp program                                                                                                                                                                        |
|------------------------------------------|--------------------------|------------|------------|------------|------------------------------------------------------------------------------------------------------------------------------------------------------------------------------------------|
|                                          | Column                   | Inject or  | Ion source | inter face |                                                                                                                                                                                          |
| <b>Organophosphorus Pesticides(OPPs)</b> | <b>40</b>                | <b>280</b> | <b>260</b> | <b>280</b> | initially at 40°C , increased to 140°C at a rate of 20°C/min, further linearly increased to 200°C (10°C/min), and continued to rise at a rate of 5°C/min while stayed at 270°C for 5 min |
| <b>Pyrethroid Pesticides(PPs)</b>        | <b>80</b>                | <b>280</b> | <b>200</b> | <b>280</b> | Initial oven temperature was 80°C, increased to 160°C at a rate of 20°C/min (held for 1 min), and ramped to 280°C at a rate of 20°C/min (held for 9 min)                                 |

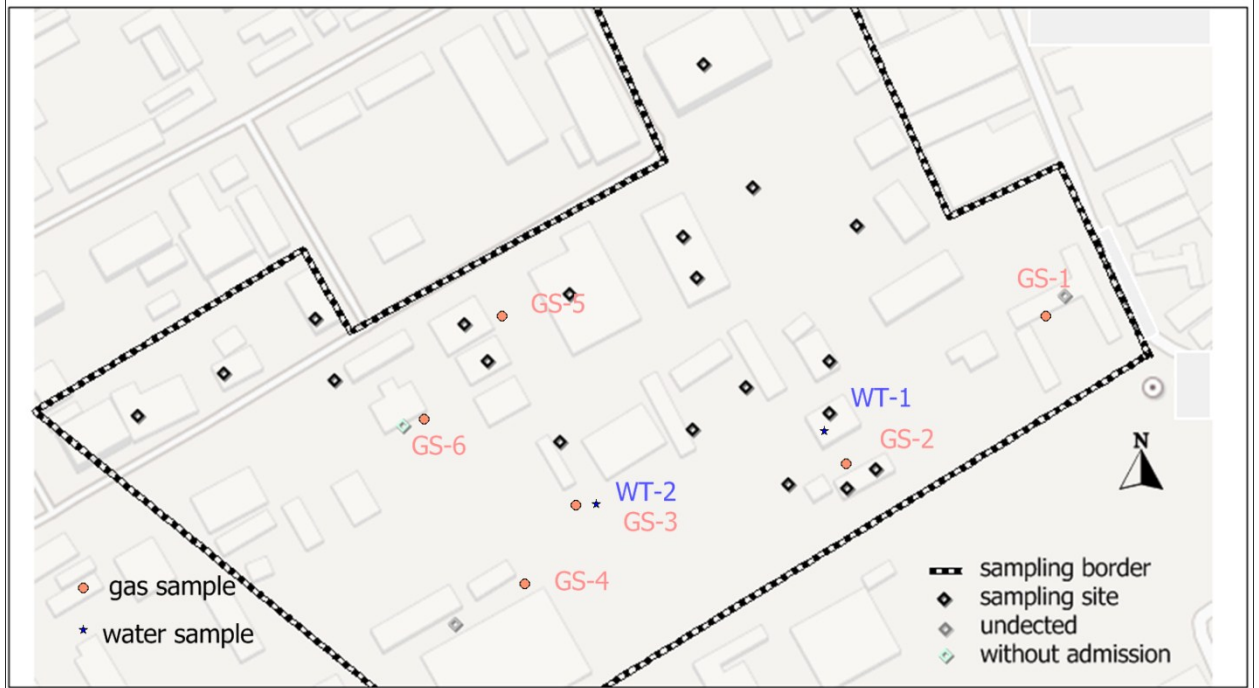

Fig. S1 Sampling map including gaseous and water sample

**Table S2 Concentration of phorate in gaseous and water samples**

| <b>Samples</b> | <b>Gas sample (<math>\mu\text{g}/\text{m}^3</math>)</b> |             |             |             |             |             | <b>Water sample (mg/L)</b> |             |
|----------------|---------------------------------------------------------|-------------|-------------|-------------|-------------|-------------|----------------------------|-------------|
|                | <b>GS-1</b>                                             | <b>GS-2</b> | <b>GS-3</b> | <b>GS-4</b> | <b>GS-5</b> | <b>GS-6</b> | <b>WT-1</b>                | <b>WT-2</b> |
| <b>phorate</b> | UD                                                      | 1.07        | 0.25        | UD          | 0.41        | 3.65        | UD                         | 2.57±0.74   |

UD-undetected

**Table S3 Existence of organophosphorus pesticide and its intermediate without standards**

| Samples | Organophosphorus pesticide |                                   |               | Intermediate        |                         |                       |
|---------|----------------------------|-----------------------------------|---------------|---------------------|-------------------------|-----------------------|
|         | Cyanthoate                 | O,O-Diethyl-O-penyl thiophosphate | Oxydisulfoton | Diethyl trisulphide | DV ethyl chrysanthemate | Methyl chrysanthemate |
| WS-1    |                            |                                   |               | *                   |                         |                       |
| WS-2    |                            |                                   |               | *                   |                         |                       |
| WS-3    | *                          |                                   | *             | *                   | *                       | *                     |
| WS-4    |                            |                                   |               |                     | *                       | *                     |
| BK-1    |                            | *                                 |               | *                   | *                       |                       |
| BK-2    |                            | *                                 | *             | *                   | *                       |                       |
| BK-3    |                            |                                   |               | *                   |                         |                       |
| BK-4    |                            |                                   |               | *                   |                         |                       |
| BK-5    | *                          |                                   |               | *                   |                         |                       |
| BK-6    | *                          |                                   |               | *                   |                         |                       |
| BK-7    | *                          | *                                 |               | *                   | *                       |                       |
| BK-8    |                            |                                   |               | *                   |                         |                       |
| WD-1    |                            |                                   |               | *                   |                         |                       |
| DS-1    |                            |                                   |               | *                   |                         |                       |
| DS-2    |                            |                                   |               |                     | *                       | *                     |
| DS-3    |                            |                                   |               | *                   |                         |                       |
| DS-4    | *                          |                                   |               | *                   |                         |                       |
| DS-5    |                            |                                   |               | *                   |                         |                       |

| Samples | Organophosphorus pesticide |                                      |               | Intermediate           |                      |                                   |
|---------|----------------------------|--------------------------------------|---------------|------------------------|----------------------|-----------------------------------|
|         | Cyanthoate                 | O,O-Diethyl-O-penyl<br>thiophosphate | Oxydisulfoton | Diethyl<br>trisulphide | DV<br>chrysanthemate | ethyl<br>Methyl<br>chrysanthemate |
| DS-6    | *                          |                                      |               | *                      | *                    |                                   |
| GT-1    | *                          | *                                    |               | *                      |                      |                                   |

\*detected

**Table S4 Pearson correlations (r) and the associated P values for organic pollutants  
(Significant at  $P \leq 0.05$  was shown in bold and significant at  $P \leq 0.01$  was shown in Bold Italic)**

|                                 | O,O,O-<br>triethylphosphoro<br>thioate | O,O'-diethyl<br>dithiophosphate | Phorate               | Parathion       | Terbufos              | Ethion                | Chlorpyrifos    | Sulfotepp      | Cholrmephos           | Phorate sulfone |
|---------------------------------|----------------------------------------|---------------------------------|-----------------------|-----------------|-----------------------|-----------------------|-----------------|----------------|-----------------------|-----------------|
| O,O'-diethyl<br>dithiophosphate | <b>0.535</b><br>0.015                  |                                 |                       |                 |                       |                       |                 |                |                       |                 |
| Phorate                         | 0.106<br>0.658                         | 0.326<br>0.161                  |                       |                 |                       |                       |                 |                |                       |                 |
| Parathion                       | -0.096<br>0.686                        | 0.064<br>0.789                  | -0.078<br>0.745       |                 |                       |                       |                 |                |                       |                 |
| Terbufos                        | <b>0.928</b><br>0.000                  | <b>0.447</b><br>0.048           | -0.031<br>0.896       | 0.155<br>0.513  |                       |                       |                 |                |                       |                 |
| Ethion                          | 0.048<br>0.840                         | 0.399<br>0.081                  | <b>0.793</b><br>0.000 | -0.089<br>0.709 | 0.049<br>0.839        |                       |                 |                |                       |                 |
| Chlorpyrifos                    | 0.046<br>0.846                         | 0.043<br>0.858                  | <b>0.457</b><br>0.043 | -0.083<br>0.729 | -0.119<br>0.618       | 0.243<br>0.302        |                 |                |                       |                 |
| Sulfotepp                       | <b>0.627</b><br>0.003                  | <b>0.642</b><br>0.002           | <b>0.472</b><br>0.036 | 0.370<br>0.108  | <b>0.566</b><br>0.009 | 0.218<br>0.355        | 0.220<br>0.351  |                |                       |                 |
| Cholrmephos                     | 0.019<br>0.938                         | 0.354<br>0.125                  | <b>0.536</b><br>0.015 | -0.057<br>0.812 | 0.117<br>0.623        | <b>0.925</b><br>0.000 | -0.076<br>0.751 | 0.043<br>0.856 |                       |                 |
| Phorate sulfone                 | 0.021<br>0.930                         | 0.354<br>0.126                  | <b>0.585</b><br>0.007 | -0.068<br>0.776 | 0.103<br>0.664        | <b>0.950</b><br>0.000 | 0.014<br>0.953  | 0.056<br>0.816 | <b>0.995</b><br>0.000 |                 |

|              |        |        |       |        |        |        |       |        |        |        |
|--------------|--------|--------|-------|--------|--------|--------|-------|--------|--------|--------|
| Cypermethrin | -0.094 | -0.134 | 0.000 | -0.070 | -0.105 | -0.051 | 0.060 | -0.100 | -0.066 | -0.032 |
|              | 0.693  | 0.574  | 0.999 | 0.770  | 0.660  | 0.832  | 0.801 | 0.676  | 0.782  | 0.892  |

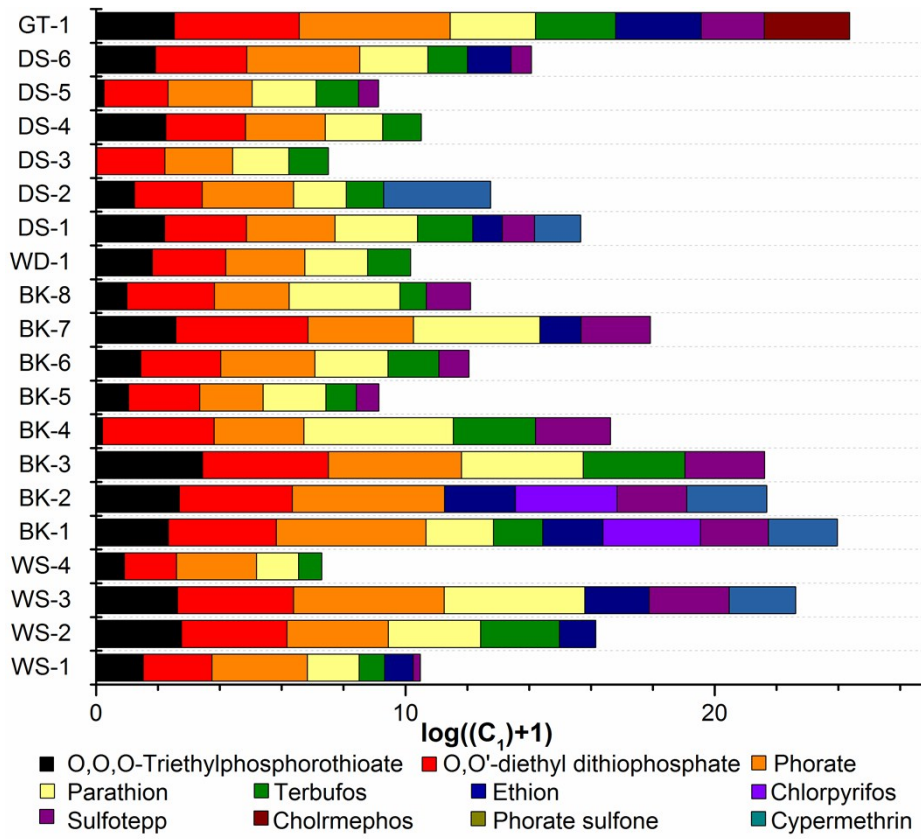

Fig S2. Log-transformed concentration of organic pollutants in different samples
